# Supplementary material for: Quantitative prediction of excited-state decay rates for radical anion photocatalysts
Source: Royal Society of Chemistry journal article supplement (doi:10.1039/d3cc02534a), 2023-01-01
Supplement: d3cc02534a1.pdf [file d3cc02534a1.pdf]

DFT-optimized coordinates have been send by email to the Editor and could also be downloaded in Zenodo repository.

All ouput data from calculations (\*.log, \*.chk gaussian files and MOMAP output files) are available in the Zenodo repository <https://doi.org/10.5281/zenodo.8092376>
